# Supplementary material for: Hypoxia-responsive micelles self-assembled from amphiphilic block copolymers for the controlled release of anticancer drugs
Source: Royal Society of Chemistry journal article supplement (doi:10.1039/c8tb02505c), 2018-11-30
Supplement: c8tb02505c1.pdf [file c8tb02505c1.pdf]

**Electronic Supplementary Information for:**

**Hypoxia-responsive micelles self-assembled from  
amphiphilic block copolymer for the controlled  
release of anticancer drug**

Yinlu Deng, Hua Yuan\* and Weizhong Yuan\*

*School of Materials Science and Engineering, Key Laboratory of Advanced Civil  
Materials of Ministry of Education, Tongji University, Shanghai 201804, People's  
Republic of China. E-mail: yuanwz@tongji.edu.cn, Tel.: +86 21 69580234, Fax: +86  
21 69584723.*

\*Corresponding author: yuanwz@tongji.edu.cn (W. Yuan)

# 1. Supplementary Results

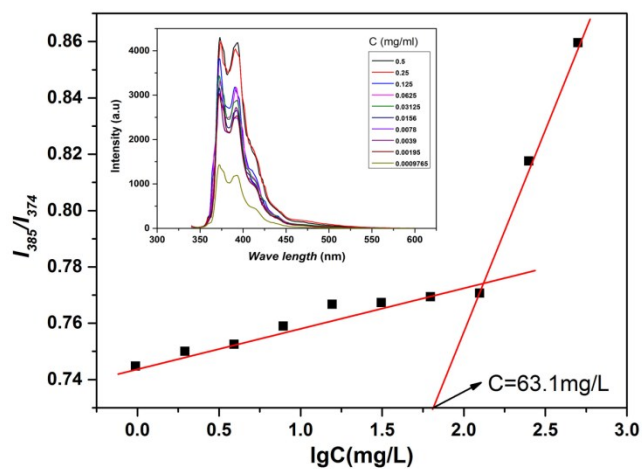

**Fig. S1** Determination of CMC for PEG-*b*-P(MAA-*co*-NIMA) using the fluorescence method with pyrene as a probe.

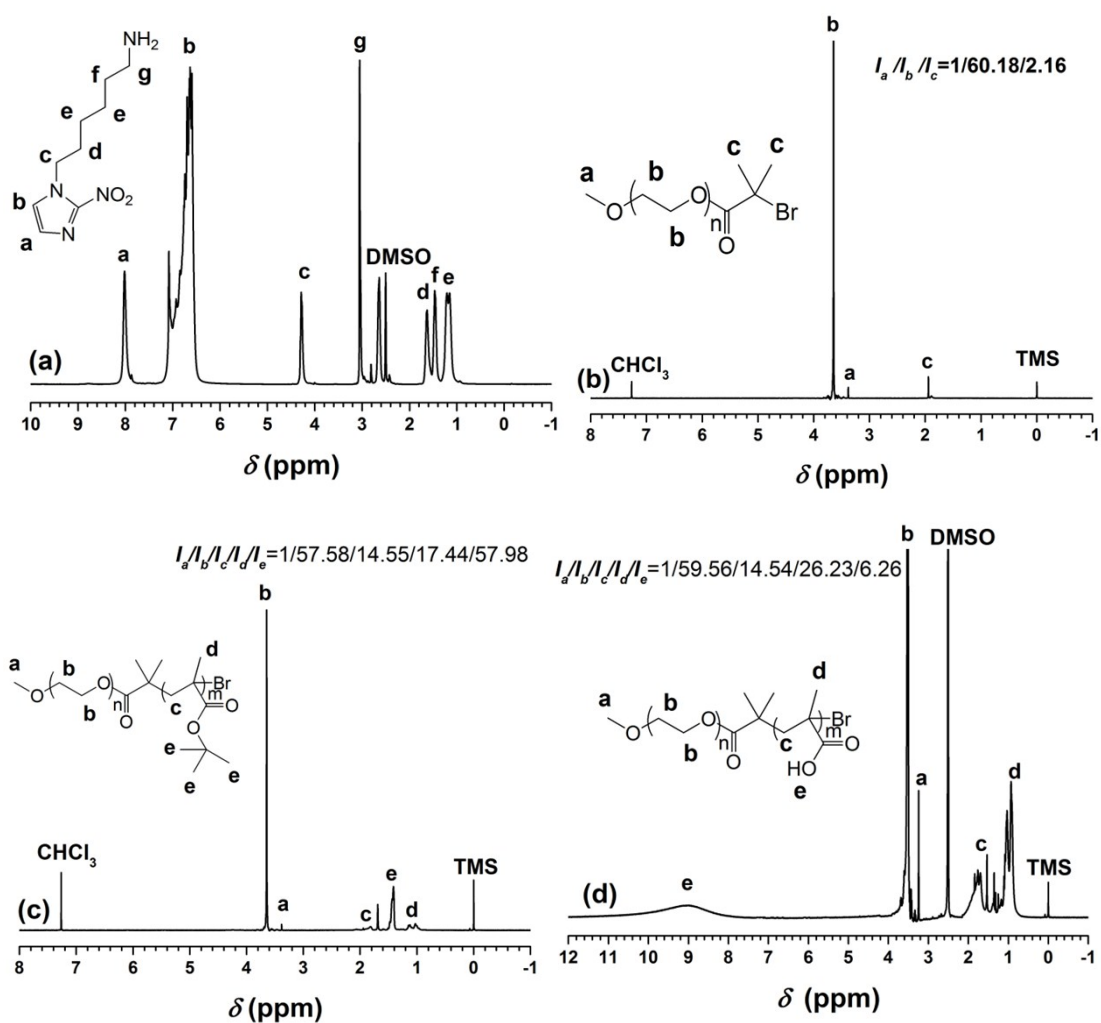

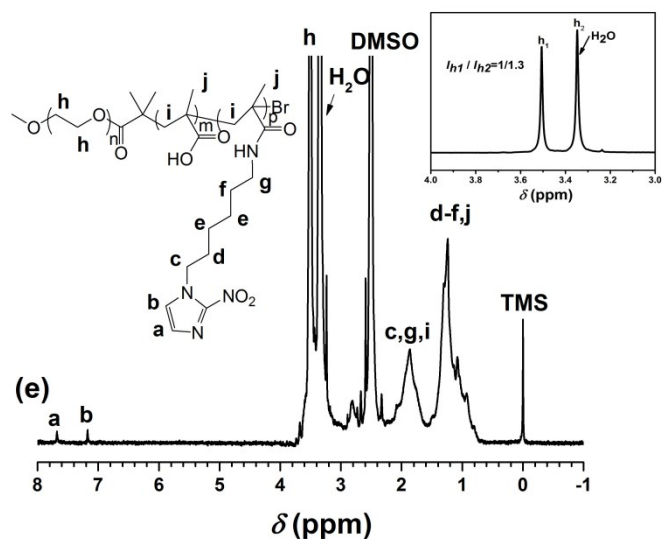

**Fig. S2**  $^1\text{H}$  NMR spectra of (a)  $\text{NH}_2\text{-NI}$ , (b)  $\text{PEG}_{45}\text{-Br}$ , (c)  $\text{PEG}_{45}\text{-}b\text{-PtBMA}_{20}$ , (d)  $\text{PEG}_{45}\text{-}b\text{-PMAA}_{20}$  and (e)  $\text{PEG}_{45}\text{-}b\text{-P(MAA}_8\text{-}co\text{-NIMA}_{12})$ . The  $I$  represents the area of the sub-integral of each peak.

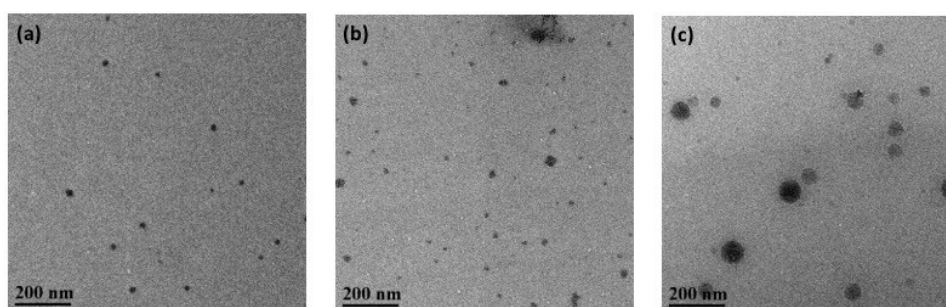

**Fig. S3** TEM images of (a)  $\text{PEG}_{45}\text{-}b\text{-P(MAA}_{14}\text{-}co\text{-NIMA}_6)$ , (b)  $\text{PEG}_{45}\text{-}b\text{-P(MAA}_{12}\text{-}co\text{-NIMA}_8)$  and (c)  $\text{PEG}_{45}\text{-}b\text{-P(MAA}_8\text{-}co\text{-NIMA}_{12})$  micelles incubated with only NADPH for 3 h under normoxic condition.

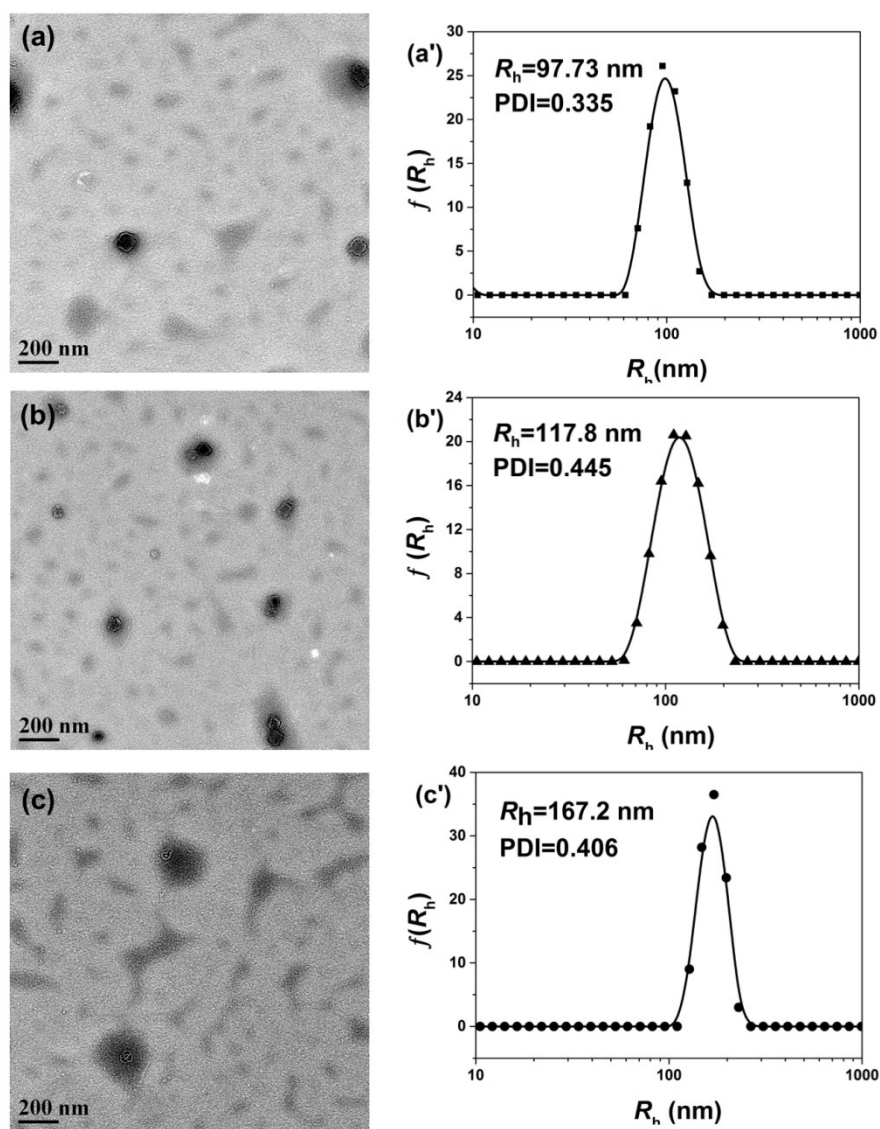

**Fig. S4** TEM images of (a) PEG<sub>45</sub>-*b*-P(MAA<sub>14</sub>-*co*-NIMA<sub>6</sub>), (b) PEG<sub>45</sub>-*b*-P(MAA<sub>12</sub>-*co*-NIMA<sub>8</sub>) and (c) PEG<sub>45</sub>-*b*-P(MAA<sub>8</sub>-*co*-NIMA<sub>12</sub>) and hydrodynamic radius ( $R_h$ ) of copolymer micelles of (a') PEG<sub>45</sub>-*b*-P(MAA<sub>14</sub>-*co*-NIMA<sub>6</sub>), (b') PEG<sub>45</sub>-*b*-P(MAA<sub>12</sub>-*co*-NIMA<sub>8</sub>) and (c') PEG<sub>45</sub>-*b*-P(MAA<sub>8</sub>-*co*-NIMA<sub>12</sub>) incubated under hypoxic condition with 100 mM NADPH as an electron donor.
